# Supplementary material
Source: PubMed Central journal article supplement (PMC6709493)
Supplement: AAC.00571-19-s0001.pdf [file AAC.00571-19-s0001.pdf]

**New-Data Letter**

**Early dissemination of *qnrE1* in *Salmonella* Typhimurium from livestock in South America**

**Daniel F. Monte,<sup>a,b\*</sup> Nilton Lincopan,<sup>c,d</sup> Louise Cerdeira,<sup>c</sup> Paula J. Fedorka-Cray,<sup>b</sup> Mariza Landgraf<sup>a</sup>**

Department of Food and Experimental Nutrition, Faculty of Pharmaceutical Sciences, Food Research Center, University of São Paulo, Brazil<sup>a</sup>; Department of Population Health and Pathobiology, North Carolina State University, College of Veterinary Medicine, Raleigh, North Carolina, USA<sup>b</sup>; Department of Clinical Analysis, Faculty of Pharmaceutical Sciences, University of São Paulo, Brazil<sup>c</sup>; Department of Microbiology, Institute of Biomedical Sciences, University of São Paulo, Brazil<sup>d</sup>.

**Keywords:** *qnrE1*, fluoroquinolones, Non-typhoidal *Salmonella*, South America

\*Address correspondence to Daniel F. M. Monte, [monte\\_dfm@usp.br](mailto:monte_dfm@usp.br), or Nilton Lincopan, [lincopan@usp.br](mailto:lincopan@usp.br)

## Supplemental material

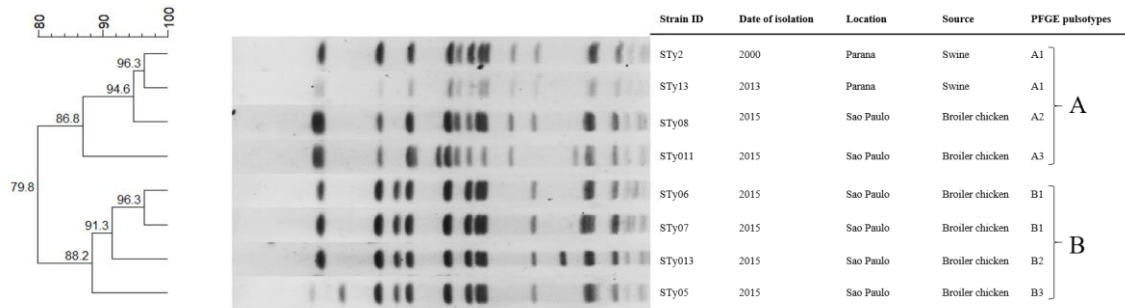

**Fig. S1.** Dendrogram showing the genotypic relatedness of eight *S. Typhimurium* strains carrying *qnrE1* gene by pulsed-field gel electrophoresis (PFGE) using *XbaI* restriction. The dendrogram was generated by using Bionumerics software V. 7.6.3 (Applied Maths NV, Keistraat, Belgium) with Dice similarity index and unweight pair group method average (UPGMA) cluster analysis. Pulsotypes A and B were clustered using a less than 80% similarity cut-off point, whereas subclusters were grouped based on a  $\geq 80\%$  similarity cut-off. Banding patterns were compared with 1% of optimization and 1% of band position tolerance.
